# Supplementary material for: Transcriptional regulation of the IL-13Rα2 gene in human lung fibroblasts
Source: PubMed Central journal article supplement (PMC6978327; doi:10.1038/s41598-020-57972-1), 2020-01-23
Supplement: 41598_2020_57972_MOESM1_ESM.pdf [file 41598_2020_57972_MOESM1_ESM.pdf]

## Supplementary Information

Transcriptional regulation of the IL13R $\alpha$ 2 gene in human lung fibroblasts

Loka R. Penke<sup>1</sup>, Hideyasu Ouchi<sup>1</sup>, Jennifer M. Speth<sup>1</sup>, Yvonne J. Huang<sup>1</sup>, and Marc Peters-Golden<sup>1, 2, \*</sup>

<sup>1</sup>Division of Pulmonary and Critical Care Medicine  
Department of Internal Medicine  
University of Michigan Medical School  
Ann Arbor, MI, USA

<sup>2</sup>Graduate Program in Immunology

\*Corresponding author:

Marc Peters-Golden, M.D.  
Phone: 734-936-5047  
Email: [petersm@umich.edu](mailto:petersm@umich.edu)

**Supplementary Table 1.** Delta Ct values for human R $\alpha$ 1 and R $\alpha$ 2 (normalized to GAPDH).

|                | Delta Ct values for R $\alpha$ 1 |          | Delta Ct values for R $\alpha$ 2 |          |
|----------------|----------------------------------|----------|----------------------------------|----------|
|                | Ct1                              | Ct2      | Ct1                              | Ct2      |
| CCL210 1       | 0.413115                         | -0.41311 | 9.82E-05                         | -9.8E-05 |
| CCL210 2       | -0.00504                         | 0.005037 | -1.55308                         | -1.61515 |
| CCL210 3       | -0.03496                         | -0.25778 | -0.89437                         | -0.91602 |
| Fib 1          | -0.75432                         | -0.83912 | 0.024089                         | -0.13572 |
| Fib 2          | 0.49419                          | 0.483061 | -0.13533                         | -0.12415 |
| alv m $\Phi$ 1 | -3.69043                         | -3.7052  | 10.84315                         | 5.48309  |
| alv m $\Phi$ 2 | -3.07409                         | -3.25203 | 6.935205                         | 7.28216  |
| alv m $\Phi$ 3 | -3.71732                         | -3.74306 | 5.699548                         | 6.854309 |
| AEC2 1         | -3.049                           | -3.0001  | 2.578239                         | 2.882716 |
| AEC2 2         | -4.03311                         | -3.89369 | 3.287333                         | 3.553622 |
| AEC2 3         | -3.32917                         | -3.22623 | 3.742526                         | 3.361178 |
| AEC2 4         | -4.16697                         | -4.08801 | 3.271862                         | 3.059289 |
| A549           | -1.18881                         | -1.21936 | 10.66169                         | 10.61898 |
| Beas-2b        | 0.062138                         | 0.020191 | 6.825636                         | 6.838631 |

**Supplementary Table 2.** List of primer sequences.

| Gene                                                                                          | Forward sequence                                     | Reverse sequence                                          | Amplicon length<br>(in base pairs) |
|-----------------------------------------------------------------------------------------------|------------------------------------------------------|-----------------------------------------------------------|------------------------------------|
| <b>A. Primers for qPCR amplification</b>                                                      |                                                      |                                                           |                                    |
| hR $\alpha$ 1                                                                                 | AGGAATACCAGTCCCGACAC                                 | TGGAATCCTTCACTTTGGTC                                      | 139                                |
| hR $\alpha$ 2                                                                                 | TCTTGGAACCTGGCATAGG                                  | TGCCTCCAAATAGGGAAATC                                      | 147                                |
| GAPDH                                                                                         | CAGCCTCAAGATCATCAGCA                                 | ACAGTCTTCTGGGTGGCAGT                                      | 138                                |
| c-FOS                                                                                         | CCGAAGGGAAAGGAATAAGA                                 | CTTCTCCTCAGCAGGTTGG                                       | 145                                |
| POSTN                                                                                         | GCAGAGAAATCCCTCCATGA                                 | TGTCCAGTCTCCAGGTTGTG                                      | 114                                |
| (m) beta actin                                                                                | GACGGCCAGGTCATCACTAT                                 | GCACTGTGTTGGCATAGAGG                                      | 166                                |
| mIL13 $\alpha$ 1                                                                              | CACCATTCCAGTCTTTGTGCG                                | TCCAGTGCAGGGTATCATCA                                      | 149                                |
| mIL13 $\alpha$ 2                                                                              | GAAGGTTACACAGGGCCAGA                                 | GAGGCTCAATGTGGGTTTCAG                                     | 126                                |
| <b>B. TSS-specific primers for PCR amplification (used in Figure 8C)</b>                      |                                                      |                                                           |                                    |
| TSS1-specific Fwd                                                                             | CAATCCTGTAACCCAGAAGCA                                | CCAAATGGTAGCCAGAAACG<br>(designated as R $\alpha$ 2 Rev1) | 1320                               |
|                                                                                               |                                                      | GGGTAGGTGTTTGGCTTACG<br>(designated as R $\alpha$ 2 Rev2) | 1383                               |
| TSS2-specific Fwd                                                                             | GCCATTGAGGCTTACCAAAG                                 | CCAAATGGTAGCCAGAAACG<br>(designated as R $\alpha$ 2 Rev1) | 1265                               |
|                                                                                               |                                                      | GGGTAGGTGTTTGGCTTACG<br>(designated as R $\alpha$ 2 Rev2) | 1328                               |
| <b>C. TSS-specific primers for qPCR amplification (used in Figure 8E)</b>                     |                                                      |                                                           |                                    |
| TSS1-specific Fwd                                                                             | CAATCCTGTAACCCAGAAGCA<br>(designated as Fwd Primer1) | TCTCCATAGCAACCGTCTCC<br>(designated as Rev Primer1)       | 72                                 |
| TSS2-specific Fwd                                                                             | GCCATTGAGGCTTACCAAAG<br>(designated as Fwd Primer2)  |                                                           | 64                                 |
| <b>D. TSS-specific primers for regular PCR amplification (used in Supplementary Figure 5)</b> |                                                      |                                                           |                                    |
| TSS1-specific Fwd                                                                             | CAATCCTGTAACCCAGAAGCA<br>(designated as Fwd Primer1) | TCTCGGTGTCTGAAGATGAAG<br>(designated as Rev Primer2)      | 315                                |
| TSS2-specific Fwd                                                                             | GCCATTGAGGCTTACCAAAG<br>(designated as Fwd Primer2)  |                                                           | 307                                |

## Supplementary Figure legends

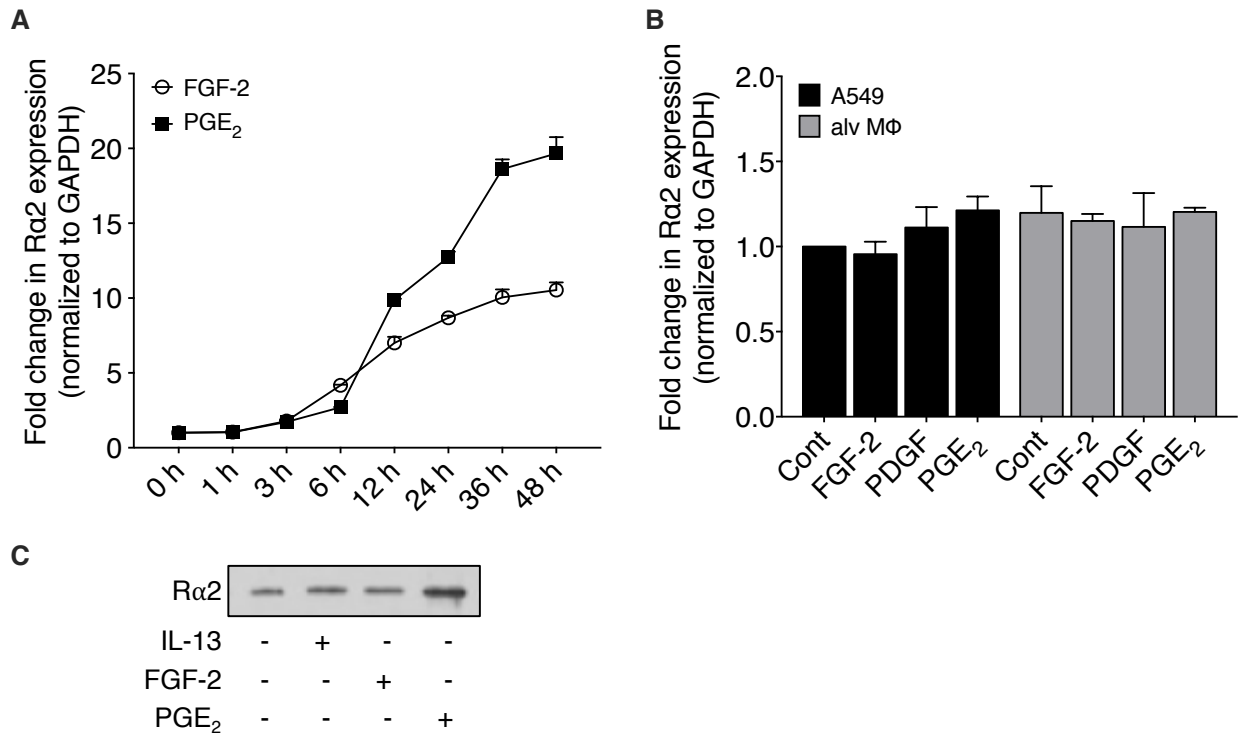

**Supplementary Figure 1. Induced expression of Rα2 in various lung cell types.** (A) qPCR analysis of PGE<sub>2</sub>- and FGF-2-induced Rα2 expression kinetics and Rα2 in human CCL210 lung fibroblasts. (B) A549 and primary alv mφs were stimulated with FGF-2, PDGF, or PGE<sub>2</sub> for 24 h and expression of Rα2 was determined using qPCR analysis. (C) CCL210 lung fibroblasts were stimulated with IL-13, FGF-2, or PGE<sub>2</sub> and release/secretion of Rα2 protein into the culture supernatant was assessed by western blot analysis of concentrates of equal volumes of supernatants. Expression is relative to that of untreated sample. Each bar represents mean values (± S.E.) from three independent samples. \*p<0.05.

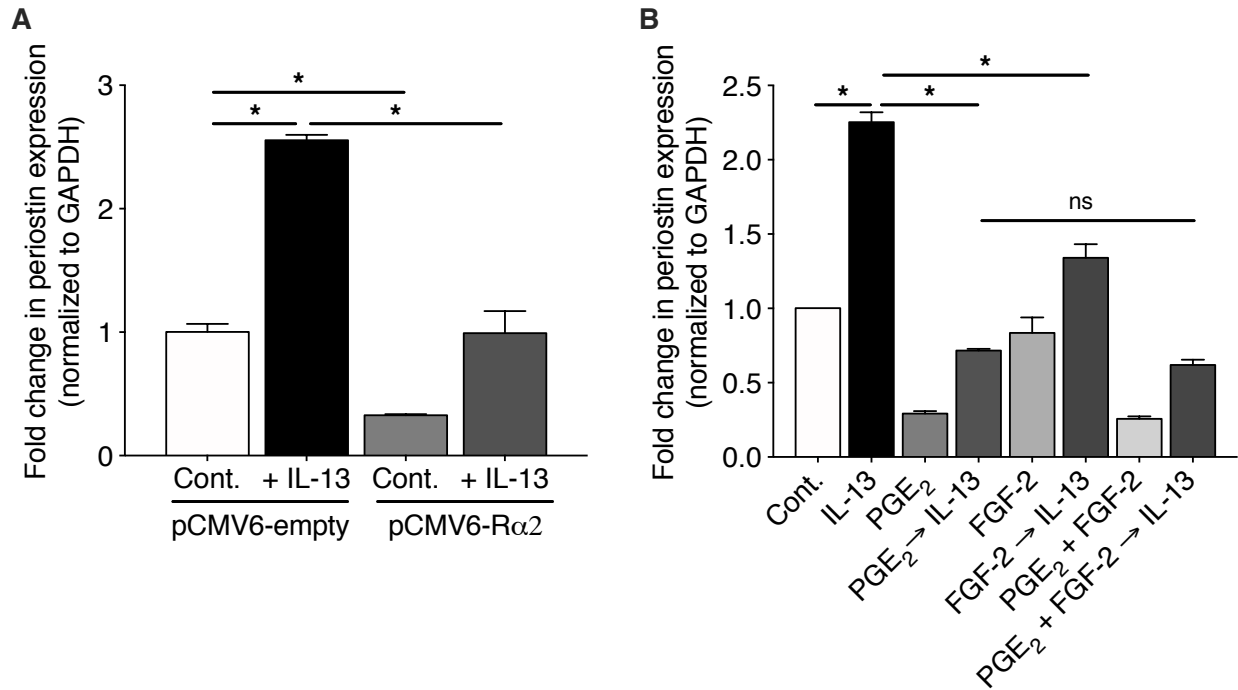

**Supplementary Figure 2. Inhibition of IL-13-induced periostin gene expression by forced overexpression of Rα2, or by stimulation with PGE<sub>2</sub> or FGF-2 in human lung fibroblasts.**

(A) CCL210 cells were transfected with pCMV6 (empty) vector or Rα2 overexpression construct (pCMV6-Rα2). 24 h post transfection, cells were stimulated ± IL-13 for additional 24 h, and the expression of periostin was determined using qPCR analysis. (B) CCL210 cells were pre-treated ± FGF-2 or ± PGE<sub>2</sub> or both (i.e., FGF-2 + PGE<sub>2</sub>) for 24 h followed by stimulation ± IL-13 for addition 24 h, and the expression of periostin was determined using qPCR analysis. Each bar represents mean values (± S.E.) from three independent experiments. \* p<0.05; ns, not significant.

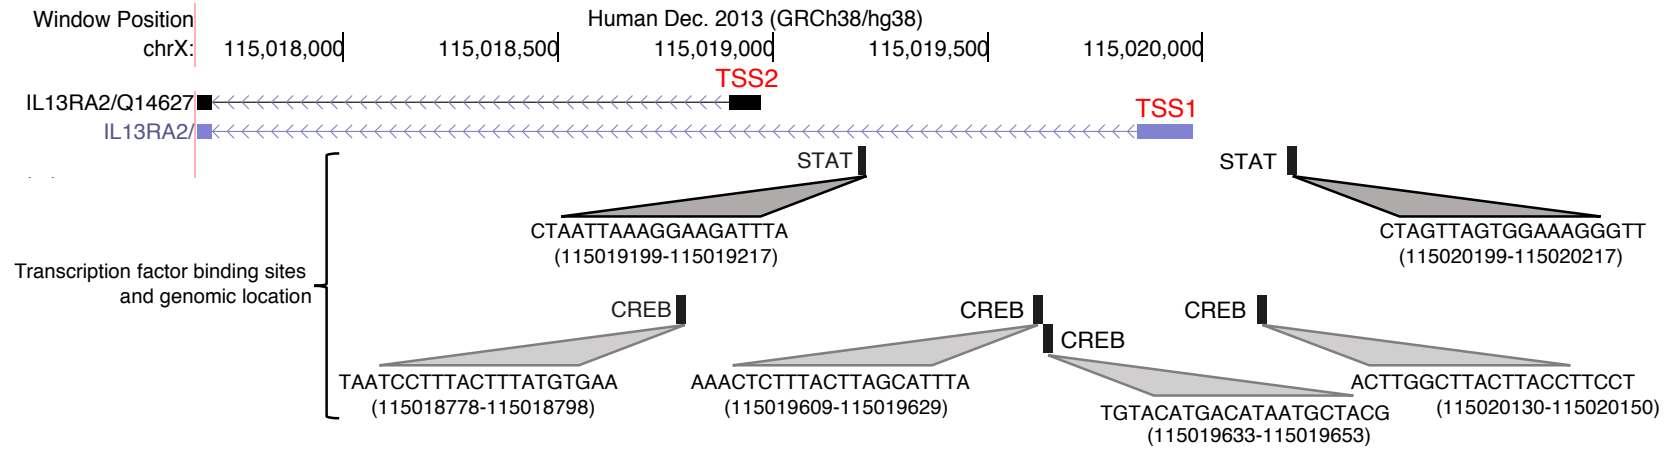

**Supplementary Figure 3. STAT and CREB binding sites in the proximity of R $\alpha$ 2 TSSs.** Diagram depicts a MatInspector-based analysis of potential STAT and CREB binding sites within the R $\alpha$ 2 promoter region spanning the two TSSs of interest.

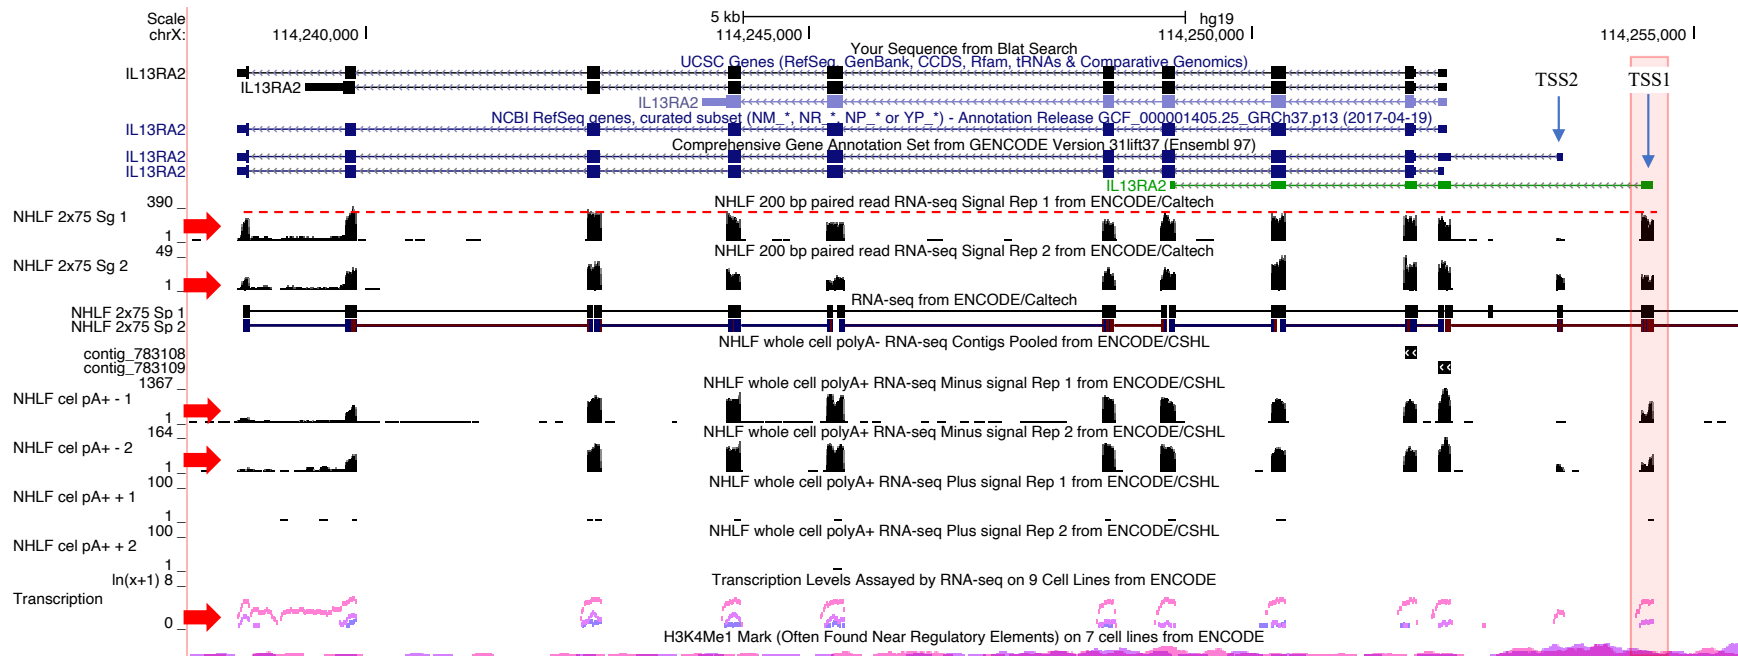

**Supplementary Figure 4. RNA-seq data from normal human lung Fibs showing utilization of alternative transcription start sites.** Diagram depicts polyA+ RNA-seq data from UCSC genome browser with expressed exons as reflected by the peak height (shown in red arrow), TSS1 and TSS2 were identified with down arrows (blue), and the highlighted vertical bar to point the TSS1-specific exon peak which is comparable across the gene (shown with dotted red line).

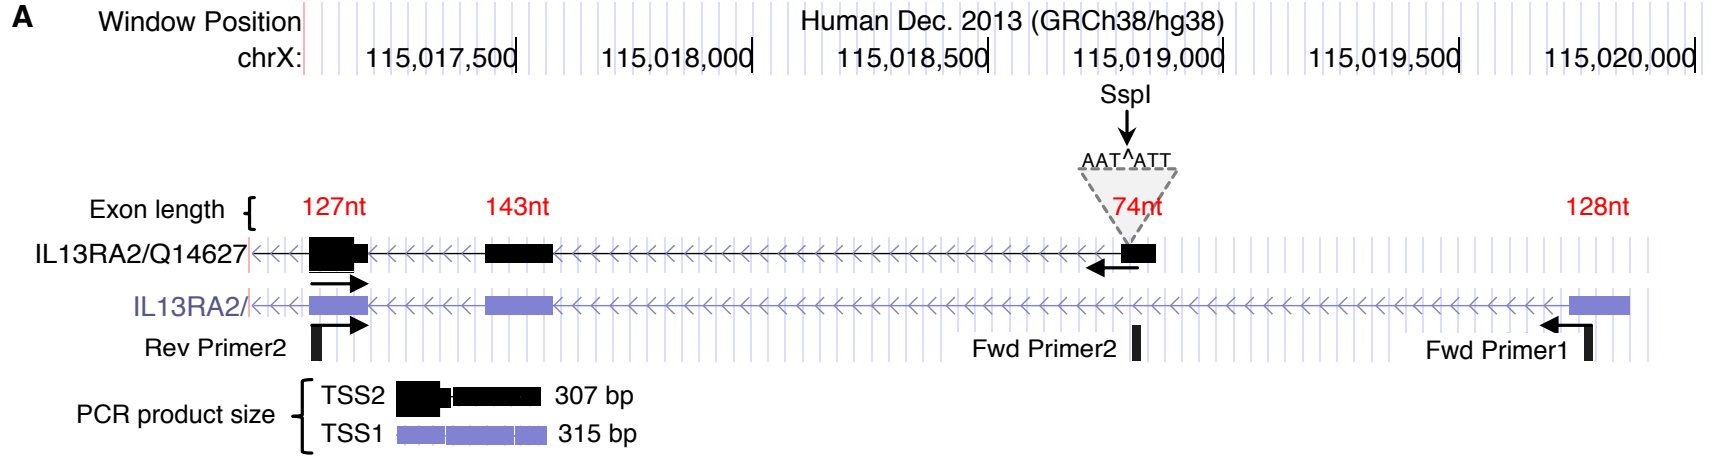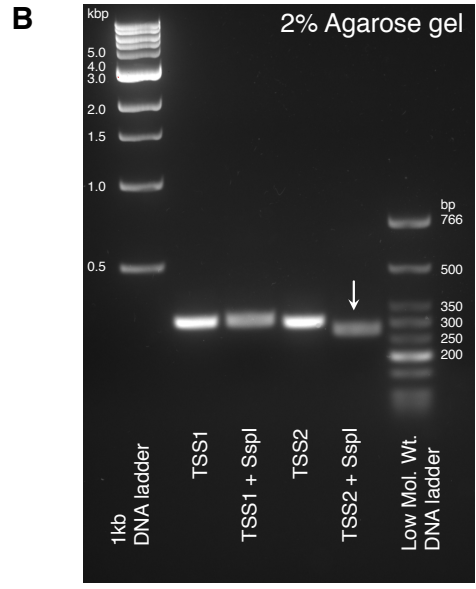

- PCR product from TSS1-specific Fwd primer:  
CAATCCTGTAACCCAGAAGCAaaggagagaattgtctttgtgttcattgggggagacggttgctatggagatggatgatatacata  
actccattgtgaaccagtaagaacactctcgtgagtctaaccggtctccggatgaaggctattgaagtcgccataacctggtcagaagtgtgc  
ctgtcggcggggagagaggcaatatcaaggtttaaatctcggagaaatggcttcgittgcttgctatcggatgcttatatacctttctgataag  
cacaacattggctgtaCTTCATCTTCAGACACCGAGA
- PCR product from TSS2-specific Fwd primer:  
GCCATTGAGGCTTACCAAAGttacaat^attacagatggatcaggggagacggttgctatggagatggatgatatacataactcca  
ttgtgaaccagtaagaacactctcgtgagtctaaccggtctccggatgaaggctattgaagtcgc  
cataacctggtcagaagtgtcctgtcggcggggagagaggcaatatcaaggtttaaatctcggagaaatggcttcgittgcttgctatcgg  
atgcttatatacctttctgataagcacaacattggctgtaCTTCATCTTCAGACACCGAGA
- SspI digests TSS2 PCR amplicon into 280bp and 27bp.



**Supplementary Figure 5. Characterization of TSS transcripts.** (A) Diagram depicts PCR primer binding sites on R $\alpha$ 2 exons for TSS-specific amplification and SspI restriction site sequence (AAT<sup>^</sup>ATT, designated by underline) within the TSS2. (B) Agarose gel image showing PCR-amplified products of TSS1 and TSS2, depicting cleavage of TSS2 by SspI enzyme (left). Nucleotide sequence of TSS-specific amplicons and digested product lengths of TSS2 after SspI cleavage (right).
